# Supplementary material for: Exploratory studies on azido-bridged complexes (Ni2+ and Mn2+) as dual colourimetric chemosensors for S2− and Ag+: combined experimental and theoretical outcomes with real field applications
Source: Royal Society of Chemistry journal article supplement (doi:10.1039/d0dt02846k), 2020-01-01
Supplement: d0dt02846k1.pdf [file d0dt02846k1.pdf]

## Supporting Information

### Exploratory studies on azido-bridged complexes ( $\text{Ni}^{2+}$ and $\text{Mn}^{2+}$ ) as dual colourimetric chemosensors for $\text{S}^{2-}$ and $\text{Ag}^+$ : combined experimental and theoretical outcomes with real field applications

Nithun Ranjan Pandit,<sup>‡a</sup> Sourav Bej,<sup>‡b,c</sup> Ananya Mondal,<sup>a,d</sup> Meenakshi Ghosh,<sup>d</sup> George E. Kostakis,<sup>e</sup> Annie K. Powell,<sup>f</sup> Priyabrata Banerjee<sup>\*b,c</sup> and Biplab Biswas<sup>\*a</sup>

---

<sup>a</sup> Department of Chemistry, Presidency University, 86/1, College Street, Kolkata 700073, India

<sup>b</sup> Surface Engineering & Tribology Group, CSIR-Central Mechanical Engineering Research Institute, Mahatma Gandhi Avenue, Durgapur 713209, India

<sup>c</sup> Academy of Scientific & Innovative Research (AcSIR), AcSIR Headquarters CSIR-HRDC Campus, Postal Staff College Area, Sector 19, Kaila Nehru Nagar, Ghaziabad – 201002, Uttar Pradesh, India

<sup>d</sup> Vidyasagar College for Women, 39 Sankar Ghosh Lane, Kolkata, 6, West Bengal, India

<sup>e</sup> School of Life Sciences, University of Sussex, Falmer, BN1 9QG, United Kingdom

<sup>f</sup> Institut für Anorganische Chemie, Karlsruhe Institute of Technology (KIT), Engesserstr. 15, D-76131 Karlsruhe, Germany.

<sup>‡</sup> Footnotes relating to the title and/or authors should appear here

Electronic Supplementary Information (ESI) available: [details of any supplementary information available should be included here]. See DOI: 10.1039/x0xx00000x

<sup>\*</sup>Equal Contribution

---

| <b>Sl. No.</b> | <b>Description</b>                                                          | <b>Entry</b>                     |
|----------------|-----------------------------------------------------------------------------|----------------------------------|
| <b>1</b>       | <b>Different coordination modes of azide co-ligand</b>                      | <b>Scheme S1</b>                 |
| <b>2</b>       | <b>Thermo Gravimetric Analysis</b>                                          | <b>Fig. S1</b>                   |
| <b>3</b>       | <b>Different orientational view of BS-1</b>                                 | <b>Fig. S2</b>                   |
| <b>4</b>       | <b>Selected bond lengths and bond angles of BS-1</b>                        | <b>Table S1</b>                  |
| <b>5</b>       | <b>Different orientational view of BS-2</b>                                 | <b>Fig. S3</b>                   |
| <b>6</b>       | <b>Sulphide mediated reduction scheme of azide centre</b>                   | <b>Scheme S2</b>                 |
| <b>7</b>       | <b>Selected bond lengths and bond angles of BS-2</b>                        | <b>Table S2</b>                  |
| <b>8</b>       | <b>B-H plot of BS-1 with S<sup>2-</sup></b>                                 | <b>Fig. S4</b>                   |
| <b>9</b>       | <b>Limit of detection of BS-1 for S<sup>2-</sup></b>                        | <b>Fig. S5</b>                   |
| <b>10</b>      | <b>B-H plot of BS-1 with Ag<sup>+</sup></b>                                 | <b>Fig. S6</b>                   |
| <b>11</b>      | <b>Limit of detection of BS-1 for Ag<sup>+</sup></b>                        | <b>Fig. S7</b>                   |
| <b>12</b>      | <b>Comparative study of BS-1 with different anions</b>                      | <b>Fig. S8</b>                   |
| <b>13</b>      | <b>Comparative study of BS-1 with different cations</b>                     | <b>Fig. S9</b>                   |
| <b>14</b>      | <b>Effect of pH</b>                                                         | <b>Fig. S10</b>                  |
| <b>15</b>      | <b>B-H plot of BS-2 with Ag<sup>+</sup></b>                                 | <b>Fig. S11</b>                  |
| <b>16</b>      | <b>Limit of detection of BS-2 for Ag<sup>+</sup></b>                        | <b>Fig. S12</b>                  |
| <b>17</b>      | <b>Comparative study of BS-2 with different cations</b>                     | <b>Fig. S13</b>                  |
| <b>18</b>      | <b>Time-dependent response of BS-1 &amp; BS-2 towards targeted analytes</b> | <b>Fig. S14</b>                  |
| <b>19</b>      | <b>FT-IR of BS-1 with S<sup>2-</sup> and Ag<sup>+</sup></b>                 | <b>Fig. S15a &amp; Fig. S15b</b> |
| <b>20</b>      | <b>FT-IR of BS-2 with Ag<sup>+</sup></b>                                    | <b>Fig. S16</b>                  |
| <b>21</b>      | <b>ESI-MS of BS-1 with S<sup>2-</sup> through intermediate</b>              | <b>Fig. S17</b>                  |
| <b>22</b>      | <b>Geometry optimised structure of BS-2 with their HOMO-LUMO energy gap</b> | <b>Fig. S18</b>                  |
| <b>23</b>      | <b>ESI-MS of BS-1 monomeric unit with S<sup>2-</sup></b>                    | <b>Fig. S19</b>                  |
| <b>24</b>      | <b>ESI-MS of BS-1 with Ag<sup>+</sup></b>                                   | <b>Fig. S20</b>                  |
| <b>25</b>      | <b>ESI-MS of BS-2 with Ag<sup>+</sup></b>                                   | <b>Fig. S21</b>                  |

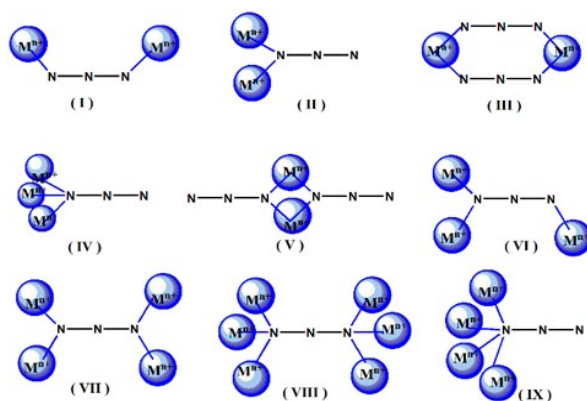

**Scheme S1** Different coordination modes of azide co-ligand

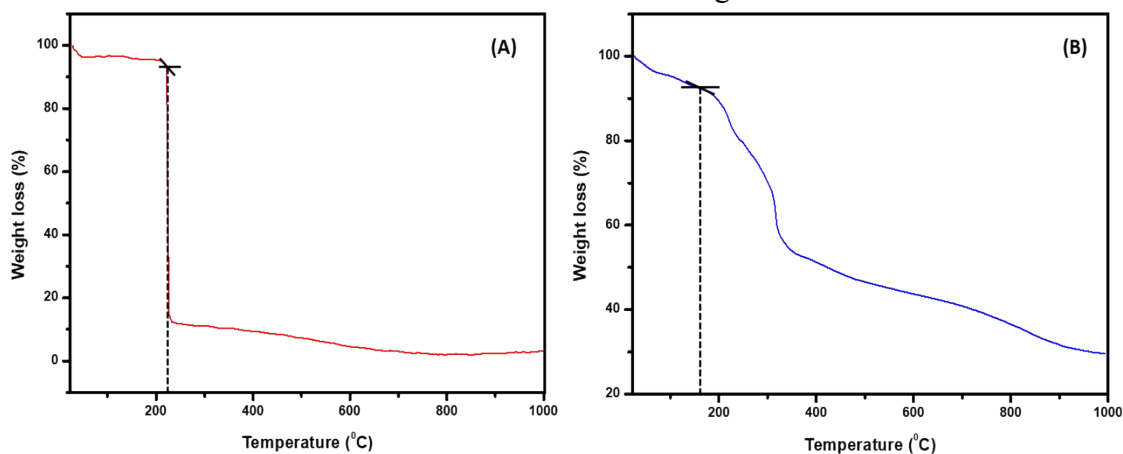

**Fig. S1** Thermo Gravimetric Analysis of (A) BS-1 (B) BS-2 showing the stability of 225 °C and 190 °C respectively

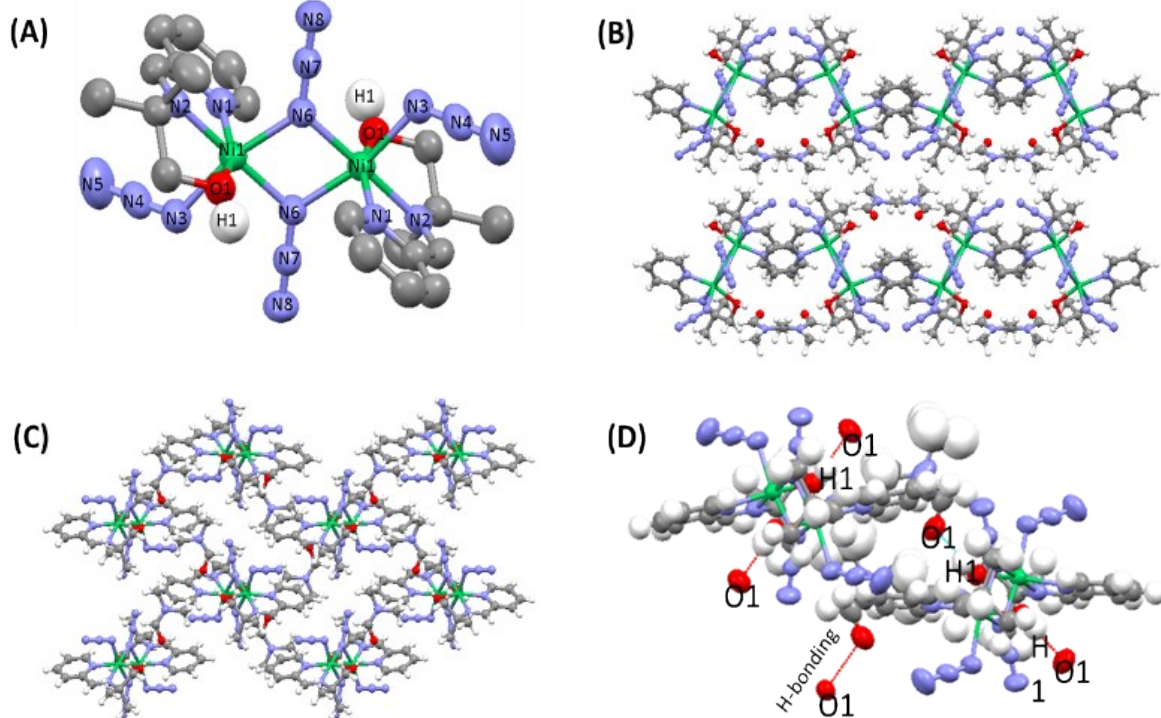

**Fig. S2** (A) Dinuclear symmetrical structure of Ni<sup>II</sup> (BS-1) (B) Scale like geometry of BS-1

cluster down the c-axis (C) ) Packing of BS-1 cluster down the a-axis (D) Network of H-bonding in BS-1 cluster.

| <b>Table S1: Selected bond length of the BS-1</b>                          |                          |                   |                         |
|----------------------------------------------------------------------------|--------------------------|-------------------|-------------------------|
| <b>Bond</b>                                                                | <b>Length in (Å)</b>     | <b>Bond</b>       | <b>Length in (Å)</b>    |
| Ni(1)-O(1)                                                                 | 2.160(2)                 | Ni(1)-N(3)        | 2.100(2)                |
| Ni(1)-N(1)                                                                 | 2.087(2)                 | Ni(1)-N(6)        | 2.055(2)                |
| Ni(1)-N(2)                                                                 | 2.021(2)                 | Ni(1)-N(6)        | 2.107(2)                |
| <b>Bond length associate to bridging azide of the BS-1</b>                 |                          |                   |                         |
| <b>Bond</b>                                                                | <b>Length in (Å)</b>     | <b>Bond</b>       | <b>Length in (Å)</b>    |
| Ni(1)-N(6)                                                                 | 2.055(2)                 | N(6)-N(7)         | 1.201(3)                |
| Ni(1)-N(6)                                                                 | 2.107(2)                 | N(7)-N(8)         | 1.140(4)                |
| <b>Bond length associate to terminal azide of the BS-1</b>                 |                          |                   |                         |
| <b>Bond</b>                                                                | <b>Length in (Å)</b>     |                   |                         |
| Ni(1)-N(3)                                                                 | 2.100(2)                 |                   |                         |
| N(3)-N(4)                                                                  | 1.155(4)                 |                   |                         |
| N(4)-N(5)                                                                  | 1.167(5)                 |                   |                         |
| <b>Selected bond angles of the BS-1</b>                                    |                          |                   |                         |
| <b>Bond angle</b>                                                          | <b>In (°)</b>            | <b>Bond angle</b> | <b>In(°)</b>            |
| N(3)-Ni(1)-N(1)                                                            | 91.4(1)                  | N(6)-Ni(1)-N(1)   | 102.2(1)                |
| N(3)-Ni(1)-N(2)                                                            | 91.5(1)                  | N(6)-Ni(1)-N(2)   | 177.93(9)               |
| N(3)-Ni(1)-N(6)                                                            | 90.1(1)                  | N(6)-Ni(1)-N(3)   | 167.1(1)                |
| N(3)-Ni(1)-O(1)                                                            | 88.35(9)                 | N(6)-Ni(1)-O(1)   | 101.12(8)               |
| <b>Bond angles associate with bridging and terminal azide of the BS-1:</b> |                          |                   |                         |
| <b>Bond</b>                                                                | <b>Bond angle in (°)</b> | <b>Bond</b>       | <b>Bond angle in(°)</b> |
| N(6)-Ni(1)-N(6)                                                            | 77.62(9)                 | Ni(1)-N(3)-N(4)   | 120.6(2)                |
| Ni(1)-N(6)-N(7)                                                            | 125.3(2)                 | Ni(1)-N(6)-Ni(1)  | 102.4(1)                |
| <b>Bond lengths associate with Hydrogen bonding in BS-1:</b>               |                          |                   |                         |
| <b>Bond</b>                                                                | <b>Length in (Å)</b>     |                   |                         |
| O(2)-H(1)                                                                  | 1.801                    |                   |                         |

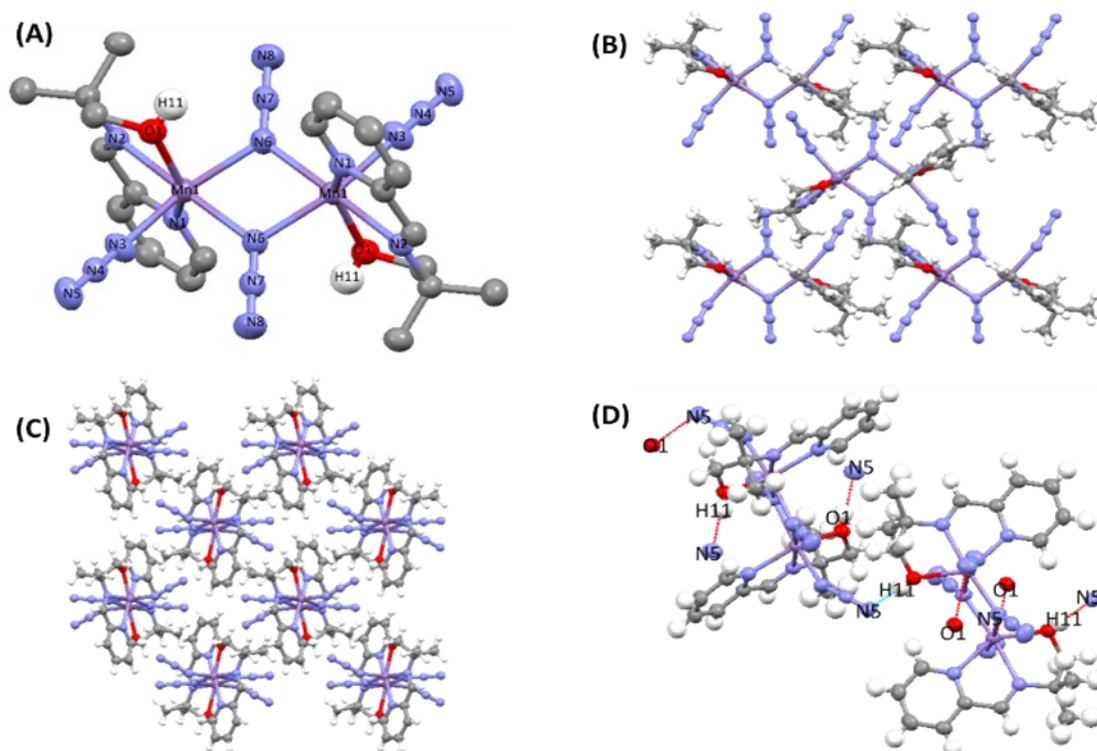

**Fig. S3** (A) Dinuclear symmetrical structure of Mn<sup>II</sup> (BS-2) (B) Packing of BS-2 cluster down the c-axis (C) Floral geometry BS-2 cluster down the a-axis (D) Network of H-bonding in BS-2 cluster.

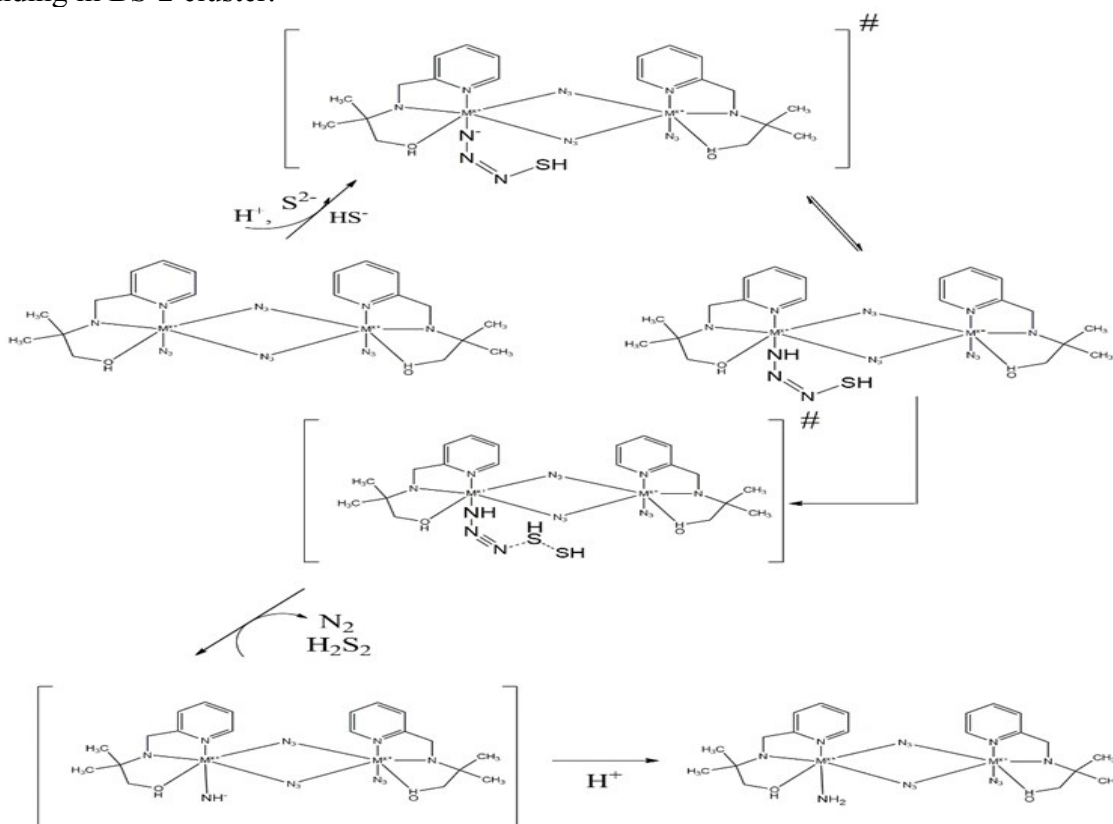

**Scheme S2** Sulphide mediated reduction scheme of azide centre

| <b>Table S2: Selected bond length of BS-2:</b>                         |                      |                   |                      |
|------------------------------------------------------------------------|----------------------|-------------------|----------------------|
| <b>Bond</b>                                                            | <b>Length in (Å)</b> | <b>Bond</b>       | <b>Length in (Å)</b> |
| Mn(1)-O(1)                                                             | 2.240(1)             | Mn(1)-N(3)        | 2.157(2)             |
| Mn(1)-N(1)                                                             | 2.284(1)             | Mn(1)-N(6)        | 2.216(1)             |
| Mn(1)-N(2)                                                             | 2.265(1)             | Mn(1)-N(6)        | 2.210(1)             |
| <b>Bond length associate to bridging azide of BS-2:</b>                |                      |                   |                      |
| <b>Bond</b>                                                            | <b>Length in (Å)</b> | <b>Bond</b>       | <b>Length in (Å)</b> |
| Mn(1)-N(6)                                                             | 2.216(1)             | N(6)-N(7)         | 1.177(2)             |
| Mn(1)-N(6)                                                             | 2.210(1)             | N(7)-N(8)         | 1.161(2)             |
| <b>Bond length associate to terminal azide of BS-2</b>                 |                      |                   |                      |
| <b>Bond</b>                                                            | <b>Length in (Å)</b> |                   |                      |
| Mn(1)-N(3)                                                             | 2.157(2)             |                   |                      |
| N(3)-N(4)                                                              | 1.159(2)             |                   |                      |
| N(4)-N(5)                                                              | 1.173(2)             |                   |                      |
| <b>Selected bond angles of BS-2</b>                                    |                      |                   |                      |
| <b>Bond angle</b>                                                      | <b>In (°)</b>        | <b>Bond angle</b> | <b>In(°)</b>         |
| N(3)-Mn(1)-N(1)                                                        | 90.75(5)             | N(6)-Mn(1)-N(1)   | 113.80(5)            |
| N(3)-Mn(1)-N(2)                                                        | 92.25(5)             | N(6)-Mn(1)-N(2)   | 172.49(5)            |
| N(3)-Mn(1)-N(6)                                                        | 166.71(6)            | N(6)-Mn(1)-N(3)   | 91.17(6)             |
| N(3)-Mn(1)-O(1)                                                        | 91.03(5)             | N(6)-Mn(1)-O(1)   | 113.80(5)            |
| <b>Bond angles associate with bridging and terminal azide of BS-2:</b> |                      |                   |                      |
| <b>Bond angle</b>                                                      | <b>In (°)</b>        | <b>Bond angle</b> | <b>In (°)</b>        |
| N(6)-Mn(1)-N(6)                                                        | 76.42(5)             | Mn(1)-N(3)-N(4)   | 150.4(1)             |
| Mn(1)-N(6)-N(7)                                                        | 126.9(1)             | Mn(1)-N(6)-Mn(1)  | 103.58(6)            |
| <b>Bond lengths associate with Hydrogen bonding in Complex BS-2</b>    |                      |                   |                      |
| <b>Bond</b>                                                            | <b>Length in (Å)</b> |                   |                      |
| N(5)-O(1)                                                              | 2.795                |                   |                      |
| N(5)-H(11)                                                             | 1.988                |                   |                      |

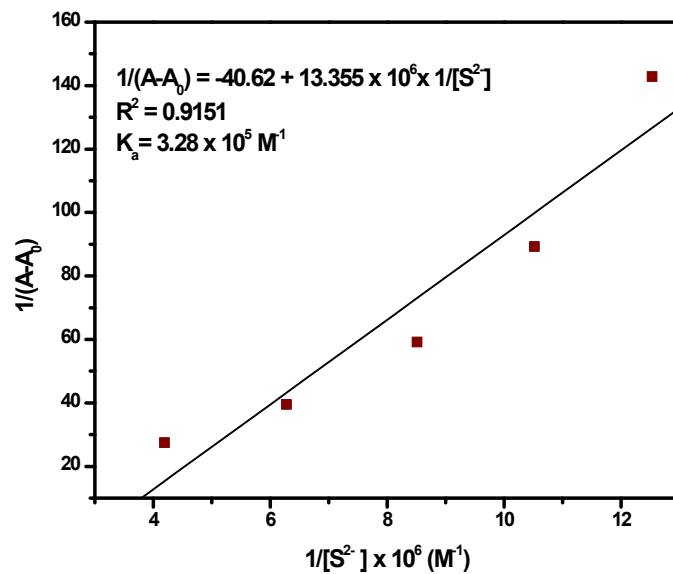

**Fig. S4** Benesi–Hildebrand (B-H) plot for absorbance of  $S^{2-}$  with BS-1 for the association constant determination

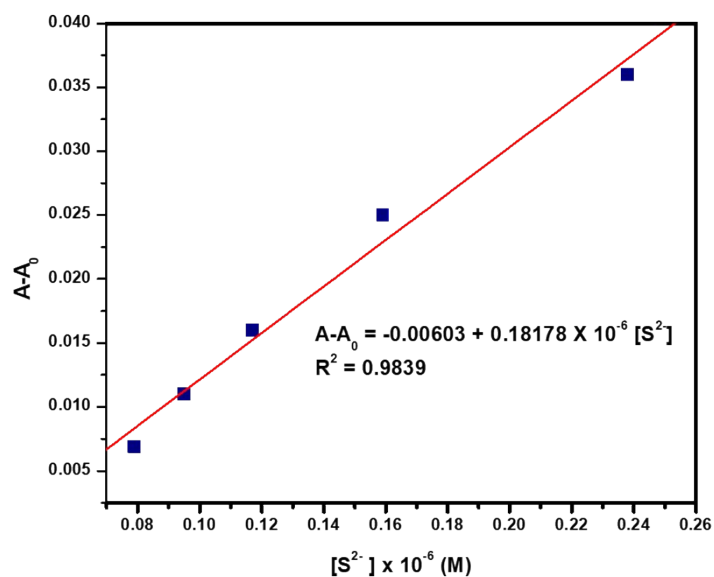

**Fig. S5** Change of absorbance as the function of the concentration of  $S^{2-}$  for the calculation of LOD of the complex BS-1 towards  $S^{2-}$

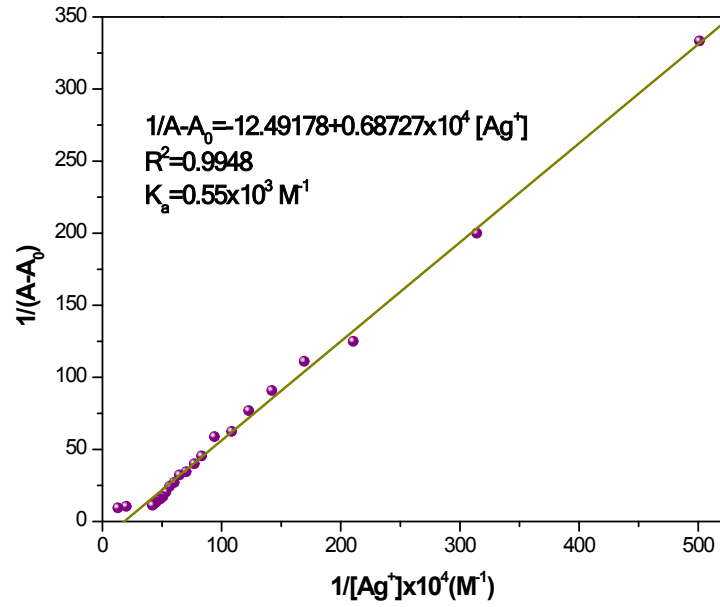

**Fig. S6** Benesi–Hildebrand (B-H) plot for absorbance of  $Ag^+$  with BS-1 for the constant association determination

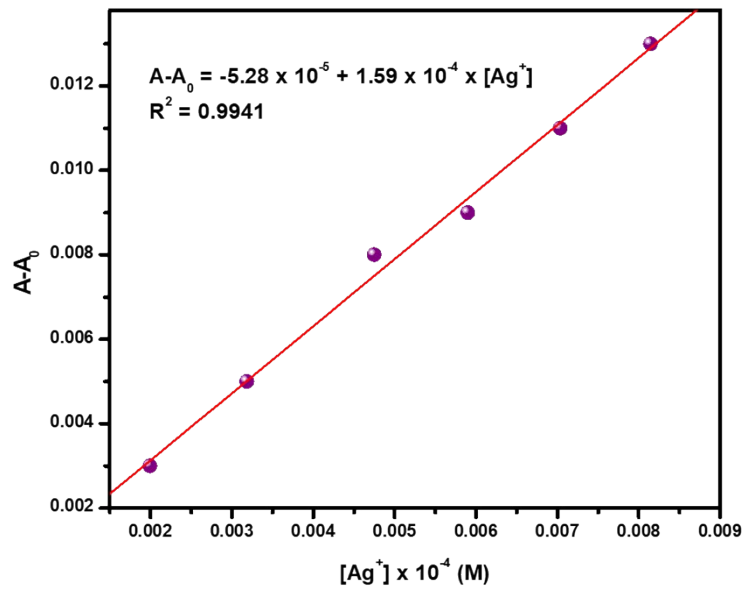

**Fig. S7** Change of absorbance as the function of the concentration of  $Ag^+$  for the calculation of LOD of the complex BS-1 towards  $Ag^+$ .



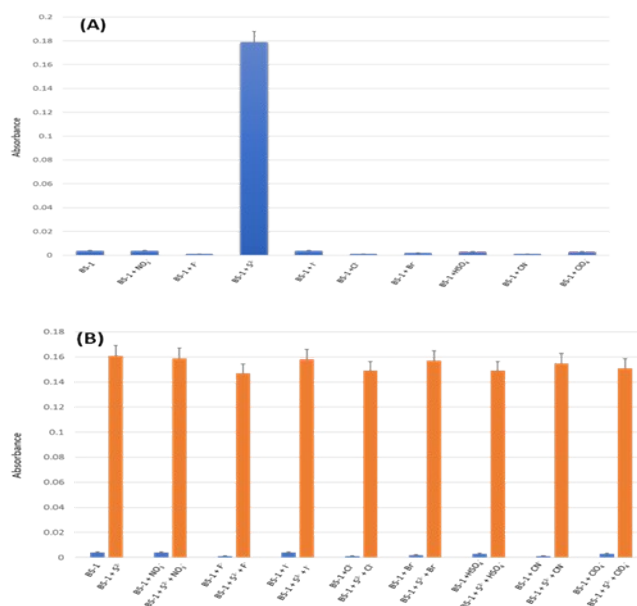

**Fig. S8** (A) Comparative study of BS-1 with different anions in aqueous phase (B) Interference study of BS-1 with different anions in the aqueous phase

In continuation, the selectivity of **BS-1** for other cations apart from  $\text{Ag}^+$  was also investigated for the detection of the toxic analyte from real field samples.

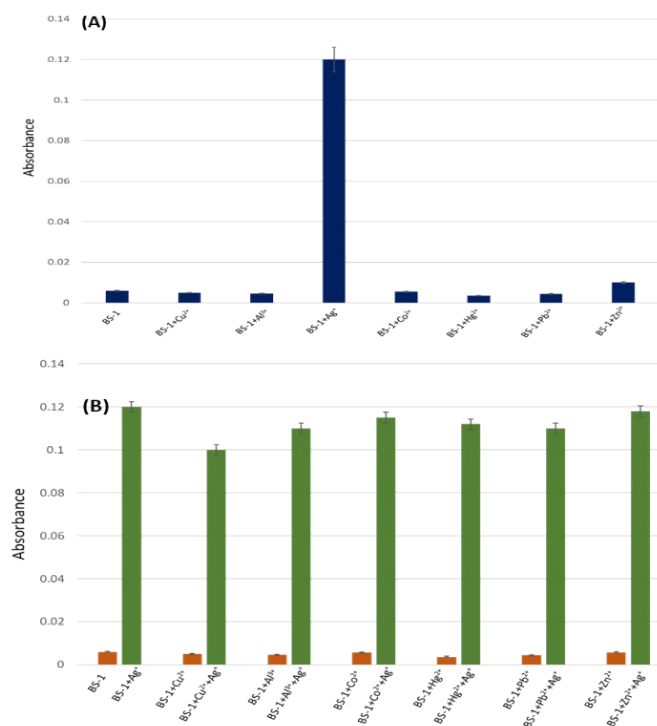

**Fig.S9** (A) Comparative study of BS-1 in DMSO medium with different cations in organo-aqueous phase (B) Interference study of BS-1 with different cations in organo-aqueous phase

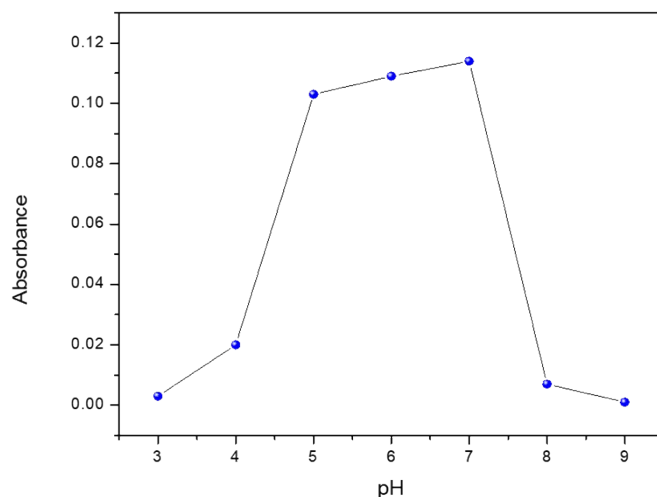

**Fig. S10** Effects of absorbance values of BS-1 with S2- at different pH.

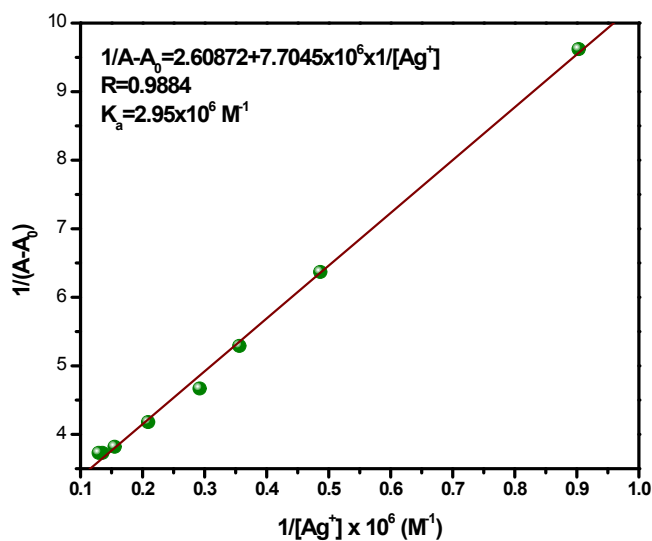

**Fig. S11** Benesi-Hildebrand (B-H) plot for absorbance of  $Ag^+$  with BS-2 for the association constant determination.

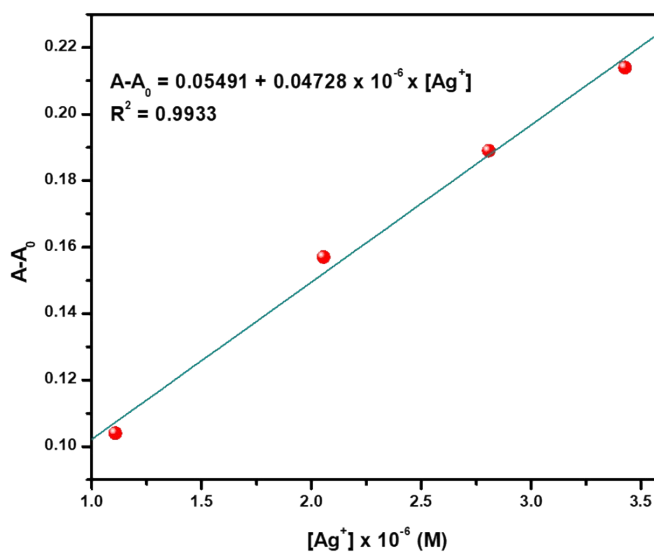

**Fig. S12** change of absorbance as the function of the concentration of  $Ag^+$  for the calculation of LOD of the complex BS-2 towards  $Ag^+$

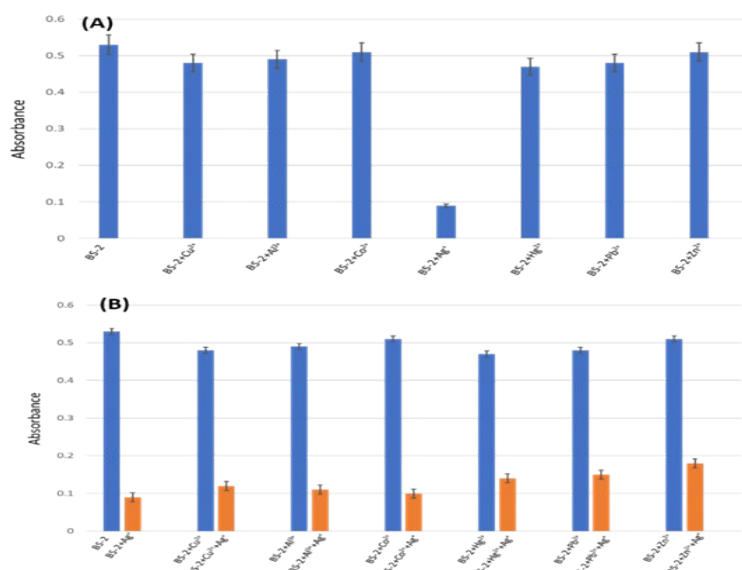

**Fig. S13** (A) Comparative study of BS-2 with different cations in organo-aqueous phase (B) Interference study of BS-2 with different cations in organo-aqueous phase

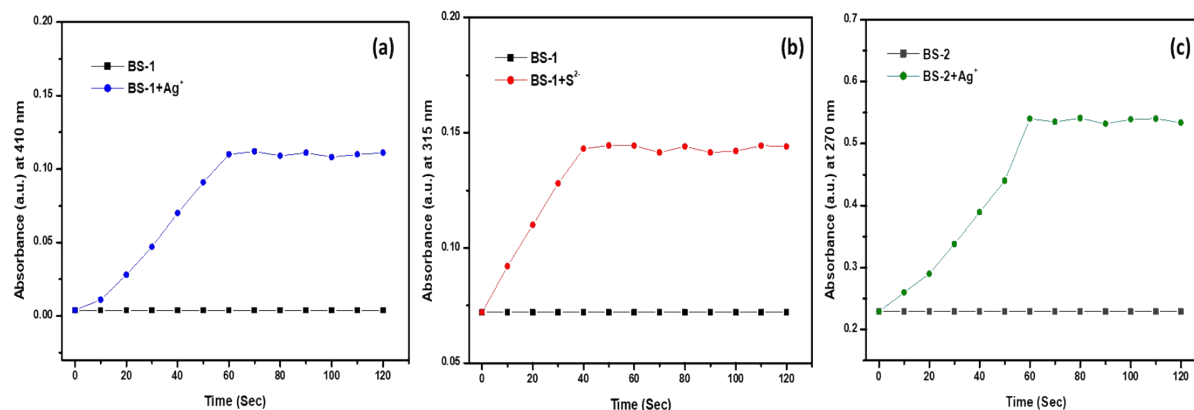

**Fig. S14** Responding time of BS-1 & BS-2 with targeted analytes. (a) Absorbance intensity changes of BS-1 at 410 nm with concurrent addition of Ag<sup>+</sup> (b) Absorbance intensity changes of BS-1 at 315 nm on gradual addition of S<sup>2-</sup> (c) Absorbance value at 270 nm changes of BS-2 with addition of Ag<sup>+</sup>

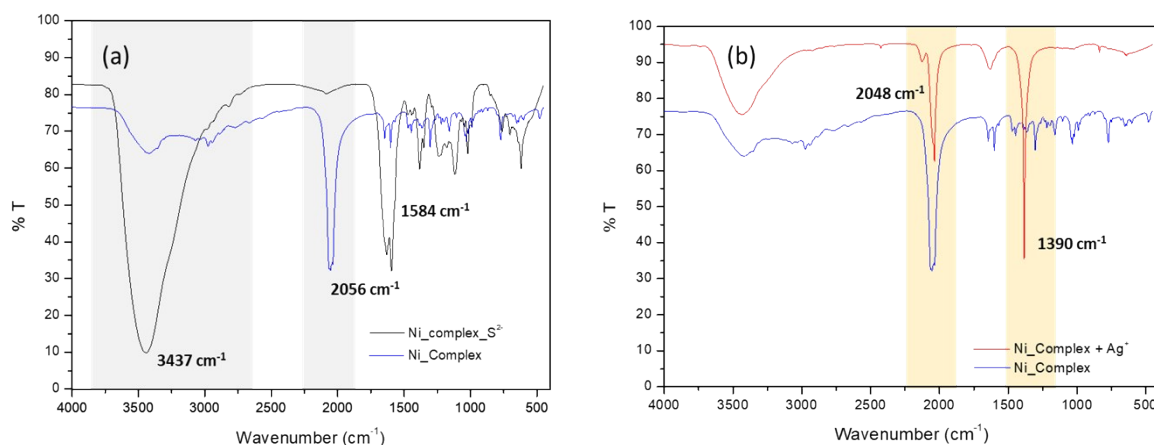

**Fig. S15**(a) FT-IR plot of BS-1 after interaction with S<sup>2-</sup> (b) FT-IR plot of BS-1 after interaction with Ag<sup>+</sup>

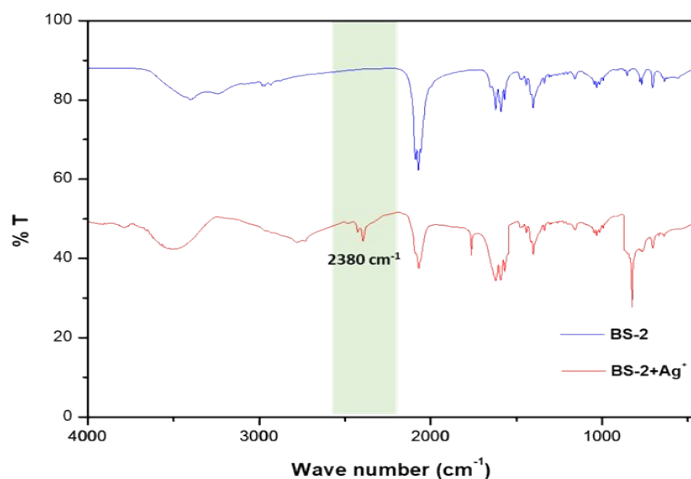

**Fig. S16** Ag-N stretching frequency at  $2380\text{ cm}^{-1}$  after interaction of BS-2 with  $\text{Ag}^+$

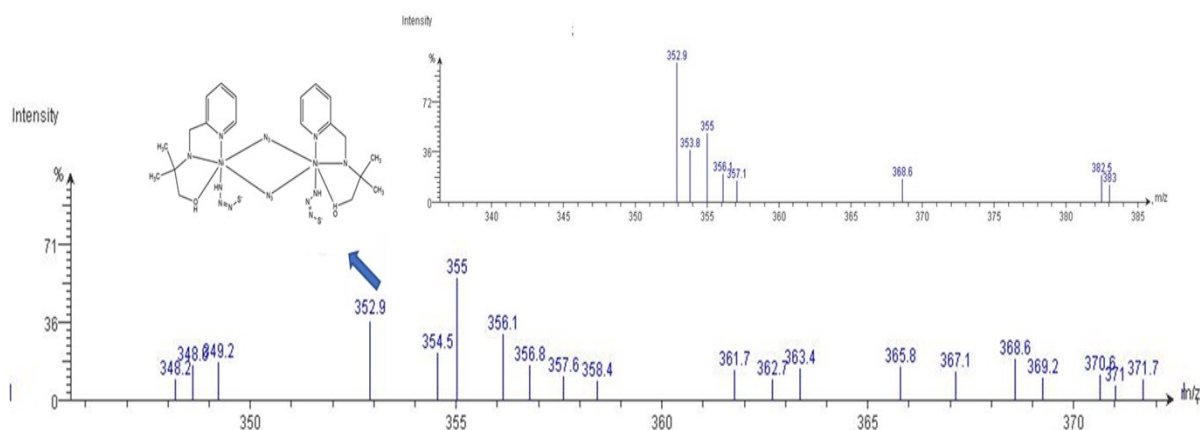

**Fig. S17** ESI-MS data of BS-1--- $\text{S}^{2-}$  adduct through an intermediate  $\{[-\text{NH}-\text{N}=\text{N}-\text{SH}]^{\#}\}$  formation

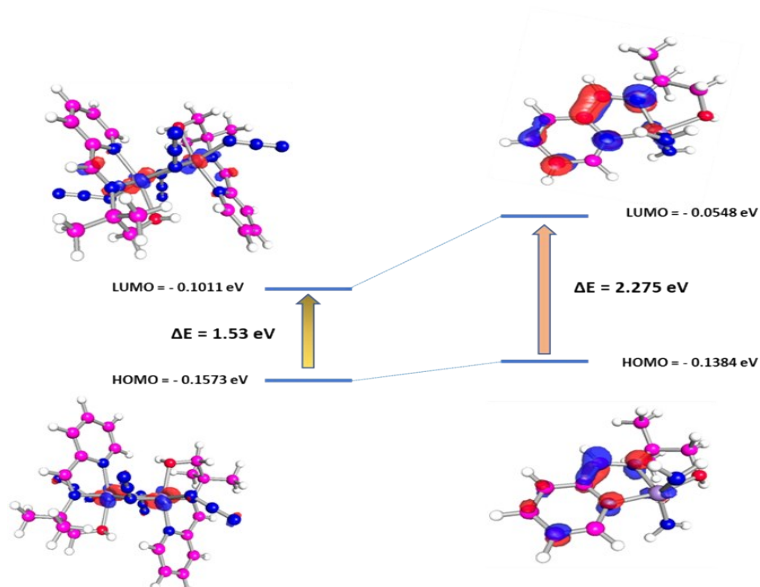

**Fig. S18** Geometry Optimised structure and HOMO-LUMO band gap of monomeric unit of chemosensor BS-2

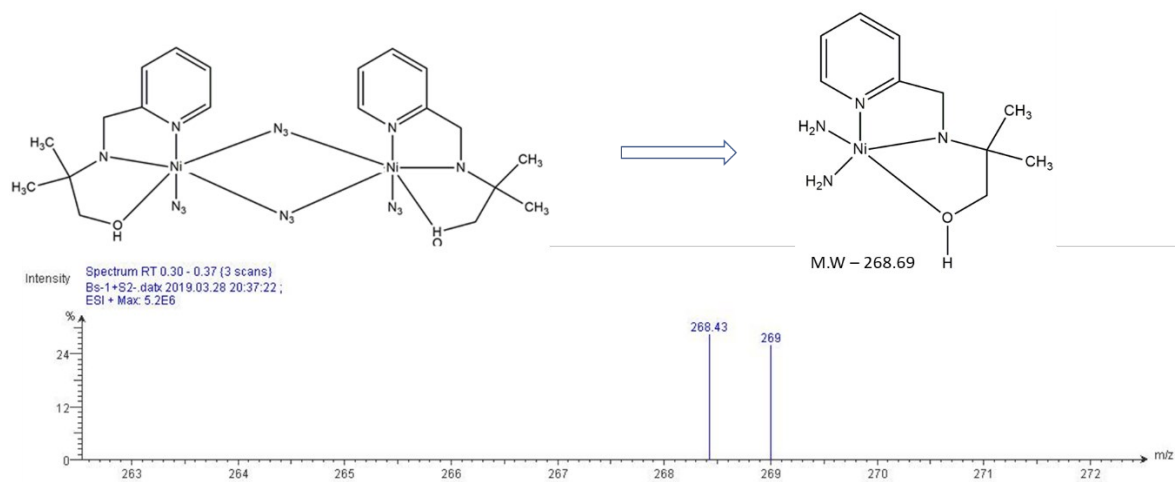

**Fig. S19** ESI-MS data of BS-1-monomeric unit after reduction by S<sup>2-</sup>

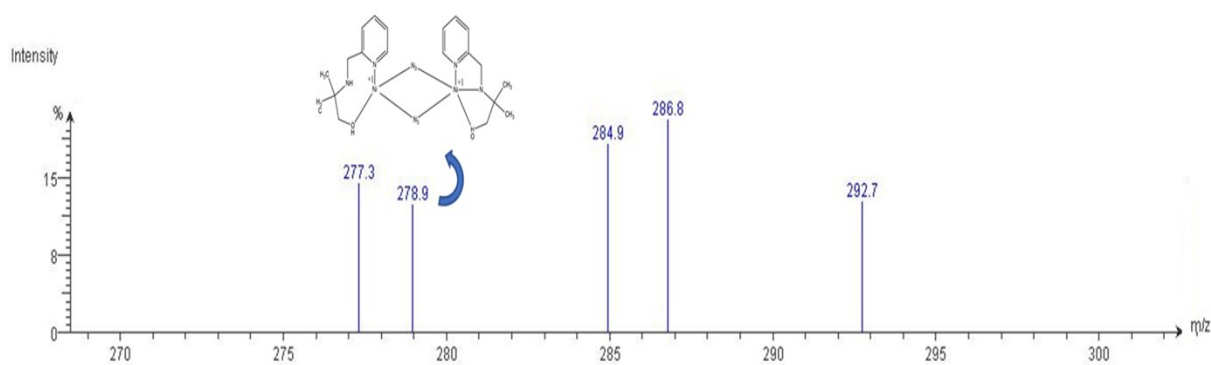

**Fig. S20** ESI-MS data of BS-1---Ag<sup>+</sup> adduct through Ag-N bond formation

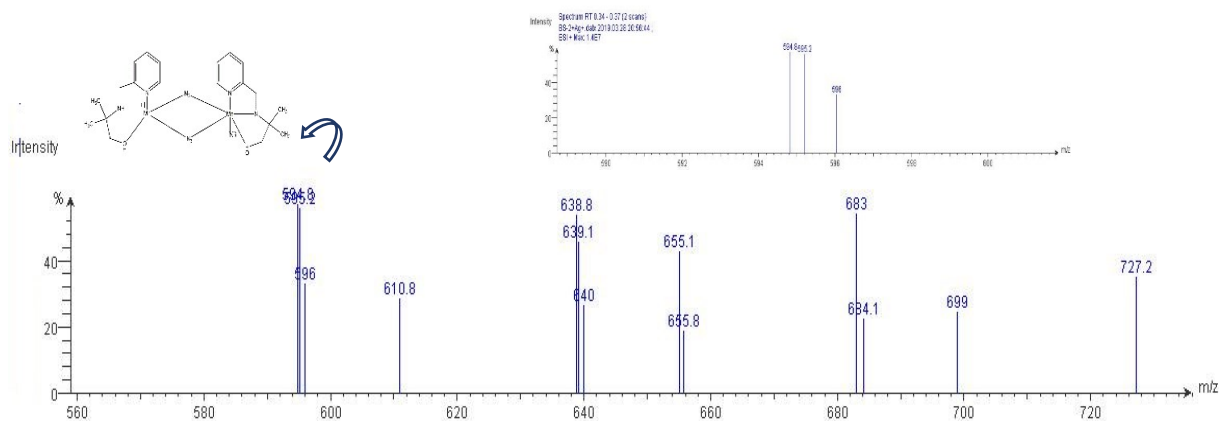

**Fig. S21** ESI-MS data of BS-2---Ag<sup>+</sup> adduct through Ag-N bond formation
